# Supplementary material for: A semi-quantitative GeLC-MS analysis of temporal proteome expression in the emerging nosocomial pathogen Ochrobactrum anthropi
Source: PubMed Central journal article supplement (PMC2394761; doi:10.1186/gb-2007-8-6-r110), 2007-06-13
Supplement: gb-2007-8-6-r110-S1.pdf [file gb-2007-8-6-r110-S1.pdf]

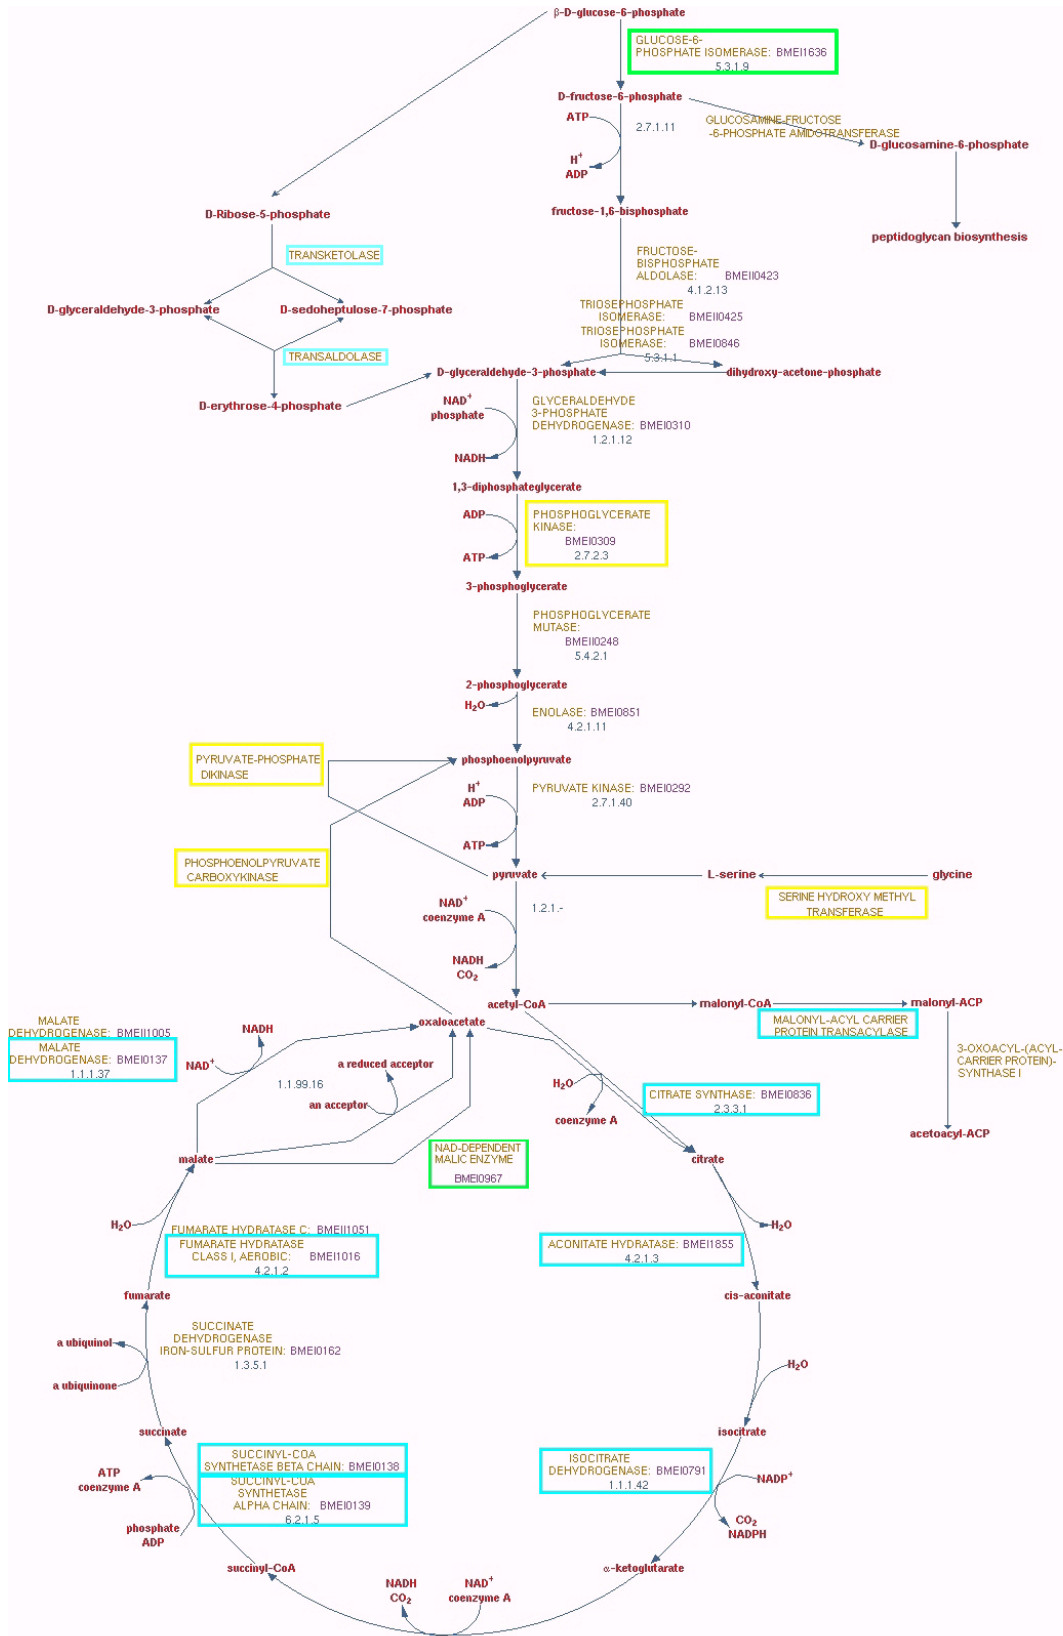

**SUPPLEMENTAL PATHWAY 1: GLYCOLYSIS, PYRUVATE DEHYDROGENASE AND TCA CYCLE.**
